# Supplementary material for: The Value of Contrast-Enhanced Ultrasound (CEUS) in Differentiating Testicular Masses: A Systematic Review and Meta-Analysis
Source: MDPI journal article supplement (doi:10.3390/app11198990), 2021-09-27
Supplement: s1 [file s1]

Archive with 1 entries (1 files):
- applsci-1383537-supplementary.pdf
