# Supplementary material for: The Value of Contrast-Enhanced Ultrasound (CEUS) in Differentiating Testicular Masses: A Systematic Review and Meta-Analysis
Source: MDPI journal article supplement (doi:10.3390/app11198990), 2021-09-27
Supplement: s1 [file s1 › applsci-1383537-supplementary.pdf]

## Supplementary Files:

### Figure S1: Search strategy

Research up to 5 June 2021:

#### PUBMED

"Testicular Neoplasms"[Mesh] AND contrast enhanced ultrasound 93

"Testicular Neoplasms/diagnosis"[Mesh] AND CEUS 25

Testicular pathologies AND contrast enhanced ultrasound 99

Testicular Neoplasms AND contrast enhanced ultrasound 116

testicular masses AND CEUS 8

#### EMBASE

('testis tumor'/exp OR 'testis tumor') AND ('contrast-enhanced ultrasound'/exp OR 'contrast-enhanced ultrasound') 58

('testicular neoplasm'/exp OR 'testicular neoplasm') AND ('contrast-enhanced ultrasound'/exp OR 'contrast-enhanced ultrasound') 59

'testicular masses' AND ('contrast-enhanced ultrasound'/exp OR 'contrast-enhanced ultrasound') 9

#### WEB OF SCIENCE

**TOPIC:** (Testicular neoplasm) *AND* **TOPIC:** (CEUS) 9

**TOPIC:** (Testicular masses) *AND* **TOPIC:** (CEUS) 15

**TOPIC:** (Testicular tumor) *AND* **TOPIC:** (CEUS) 31

**TOPIC:** (Testicular tumor) *AND* **TOPIC:** (contrast enhanced ultrasound) 71

**TOPIC:** (Testicular MASSES) *AND* **TOPIC:** (contrast enhanced ultrasound) 41

**Table S1a:** Quality assessment of the studies according to QUADAS-2: neoplastic vs non-neoplastic testicular masses

| References      | Risk of bias      |            |                    |                 | Applicability concerns |            |                    |
|-----------------|-------------------|------------|--------------------|-----------------|------------------------|------------|--------------------|
|                 | Patient selection | Index test | Reference standard | Flow and timing | Patient selection      | Index test | Reference standard |
| Lung et al.     | L                 | L          | L                  | H               | L                      | H          | L                  |
| Lock et al.     | L                 | L          | L                  | L               | L                      | L          | L                  |
| Schröder et al. | H                 | L          | L                  | H               | L                      | H          | L                  |
| Isidori et al.  | H                 | H          | L                  | H               | H                      | L          | L                  |

*L low risk of bias, H high risk of bias, U unclear risk of bias*

**Table S1b:** Quality assessment of the studies according to QUADAS-2: malignant vs benign testicular masses

| References         | Risk of bias      |            |                    |                 | Applicability concerns |            |                    |
|--------------------|-------------------|------------|--------------------|-----------------|------------------------|------------|--------------------|
|                    | Patient selection | Index test | Reference standard | Flow and timing | Patient selection      | Index test | Reference standard |
| Isidori et al.     | H                 | H          | L                  | H               | H                      | L          | L                  |
| Auer et al.        | H                 | L          | L                  | H               | L                      | H          | L                  |
| Lerchbaumer et al. | L                 | L          | L                  | L               | L                      | H          | L                  |

*L low risk of bias, H high risk of bias, U unclear risk of bias*

**Table S2:** True positive (TP), false positive (FP), true negative (TN) and false negative (FN) values for each study

| Neoplastic vs Non Neoplastic | TP | FP | TN | FN |
|------------------------------|----|----|----|----|
| Lock et al.                  | 38 | 1  | 7  | 5  |
| Isidori et al.               | 71 | 20 | 9  | 15 |
| Schröder et al.              | 50 | 2  | 11 | 4  |
| Lung et al.                  | 44 | 13 | 32 | 2  |
| Malignant vs Benign          | TP | FP | TN | FN |
| Isidori et al.               | 35 | 8  | 63 | 9  |
| Auer et al.                  | 12 | 10 | 33 | 0  |
| Lerchbaumer et al.           | 13 | 1  | 30 | 1  |
